# Supplementary material for: Low temperature fabrication of Fe2O3 nanorod film coated with ultra-thin g-C3N4 for a direct z-scheme exerting photocatalytic activities
Source: Royal Society of Chemistry journal article supplement (doi:10.1039/c8ra04499f), 2018-01-01
Supplement: c8ra04499f1.pdf [file c8ra04499f1.pdf]

Supplementary data

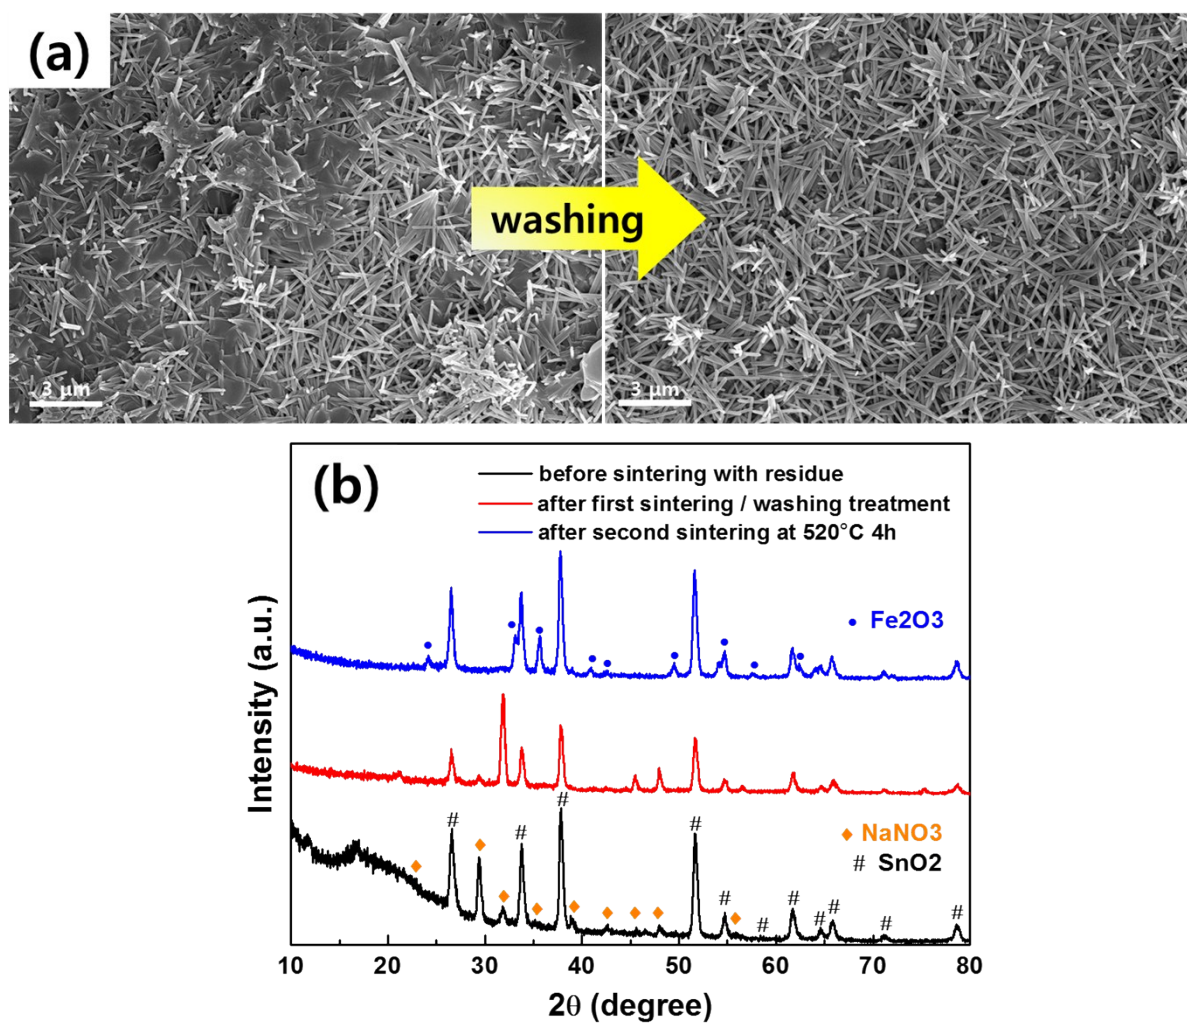

Supplementary Figure 1. (a) SEM images of the bare Fe<sub>2</sub>O<sub>3</sub> film before and after washing with DI water and (b) XRD analysis for the fabricated bare Fe<sub>2</sub>O<sub>3</sub> film.

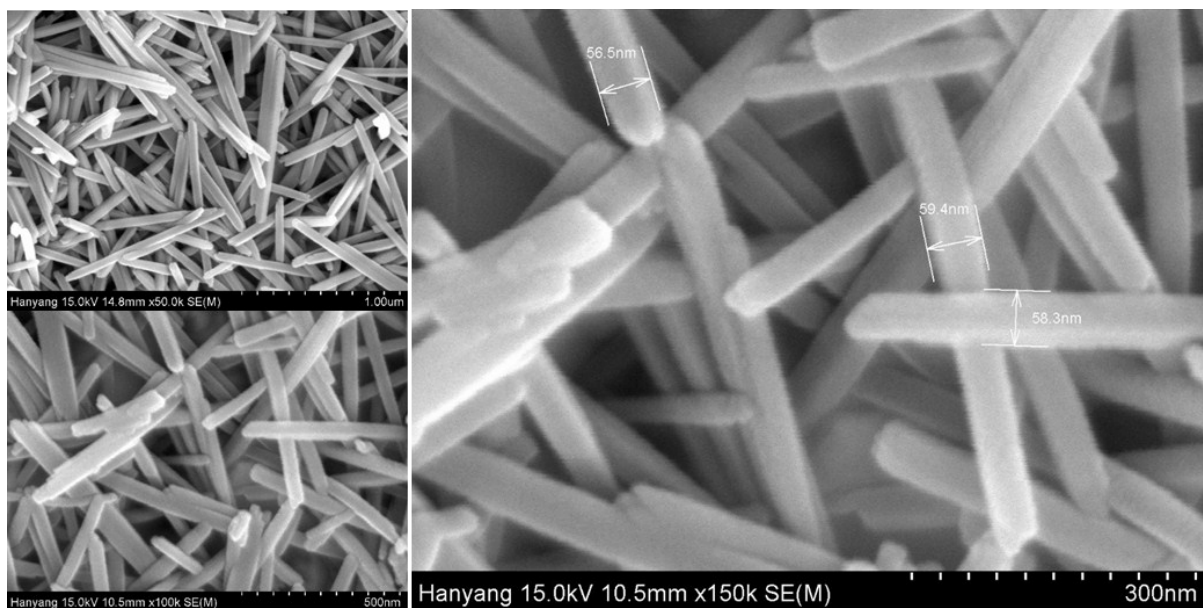

$$\text{Aspect ratio} = \frac{\text{length}}{\text{width}} = \frac{1000 \text{ nm}}{60 \text{ nm}} = 16.7$$

**Supplementary Figure 2. SEM images of bare Fe<sub>2</sub>O<sub>3</sub> nanorods showing its thickness of ~60 nm and its calculated aspect ratio.**

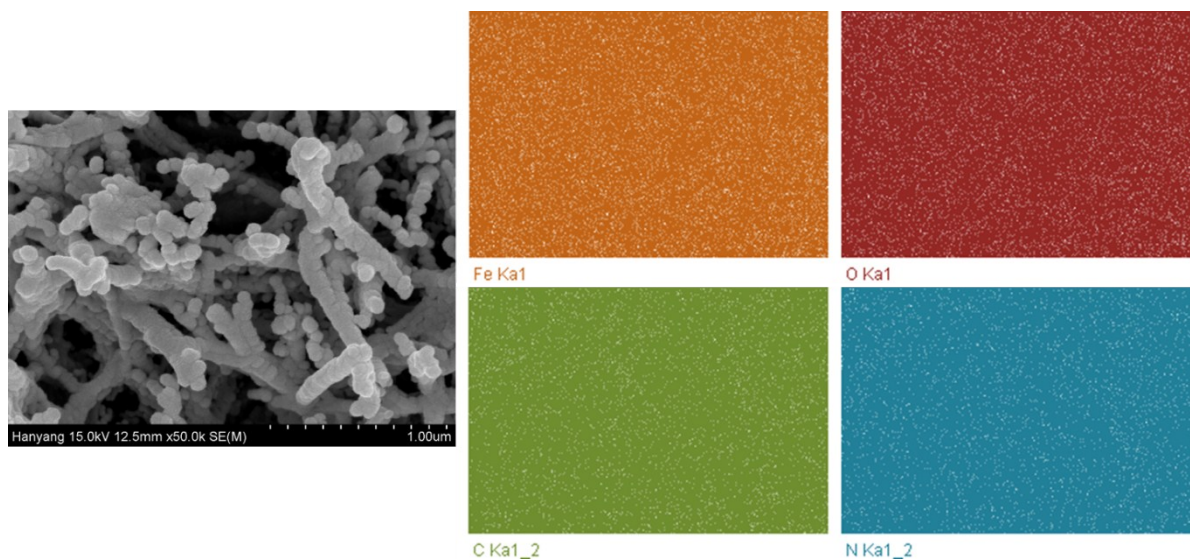

**Supplementary Figure 3. Energy-dispersive spectroscopy (EDS) mapping of 0.75g-C<sub>3</sub>N<sub>4</sub>@Fe<sub>2</sub>O<sub>3</sub> nanorods showing distribution of Fe, O, C, and N.**

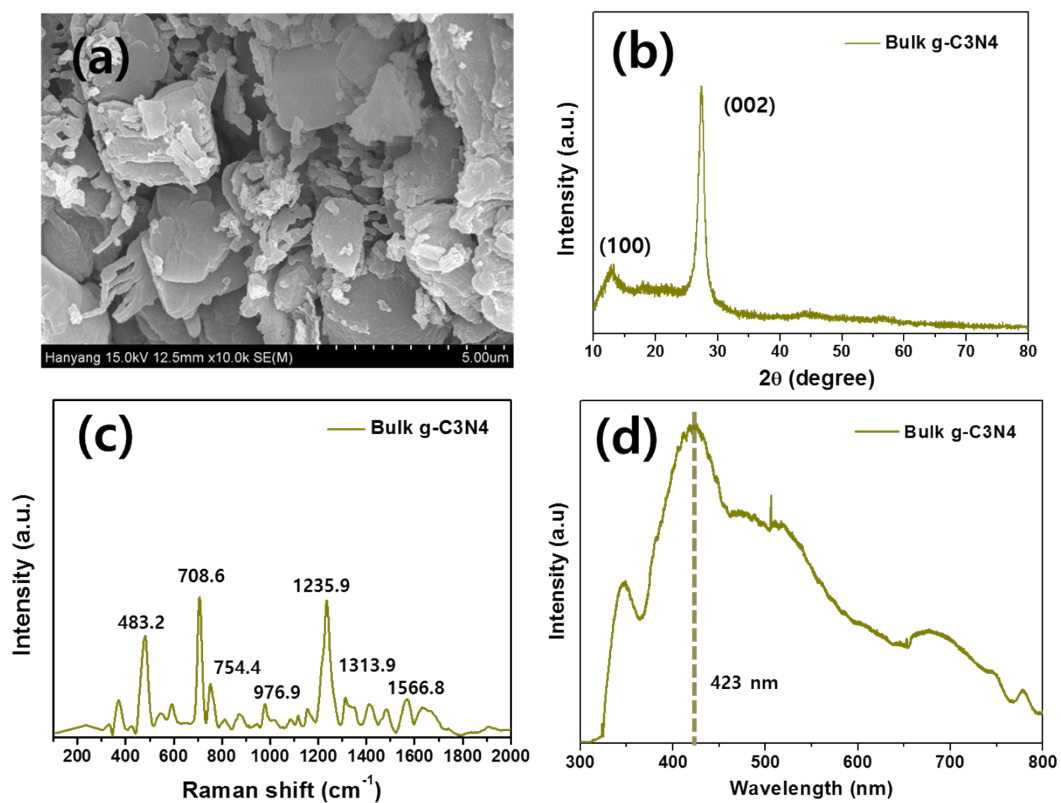

Supplementary Figure 4. (a) SEM image, (b) XRD analysis (c) Raman spectroscopy and (d) PL analysis at 325 nm for bulk g-C<sub>3</sub>N<sub>4</sub>.

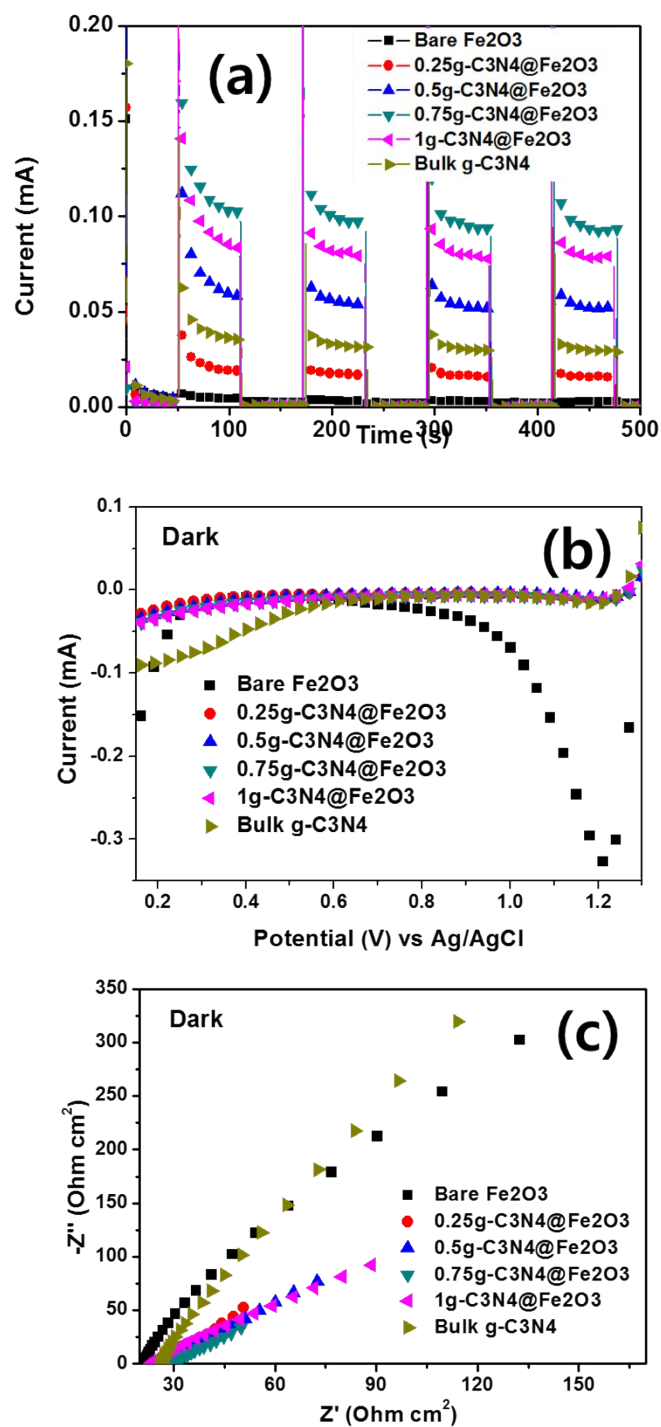

Supplementary Figure 5. (a) Transient photocurrent on-off cycles under light conditions. (b) LSV analysis and, (c), Electrochemical impedance spectroscopy (EIS) measurements under dark conditions with bare Fe<sub>2</sub>O<sub>3</sub>, 0.25g-C<sub>3</sub>N<sub>4</sub>@Fe<sub>2</sub>O<sub>3</sub>, 0.5g-C<sub>3</sub>N<sub>4</sub>@Fe<sub>2</sub>O<sub>3</sub>, 0.75g-C<sub>3</sub>N<sub>4</sub>@Fe<sub>2</sub>O<sub>3</sub>, 1g-C<sub>3</sub>N<sub>4</sub>@Fe<sub>2</sub>O<sub>3</sub> and bulk g-C<sub>3</sub>N<sub>4</sub>.

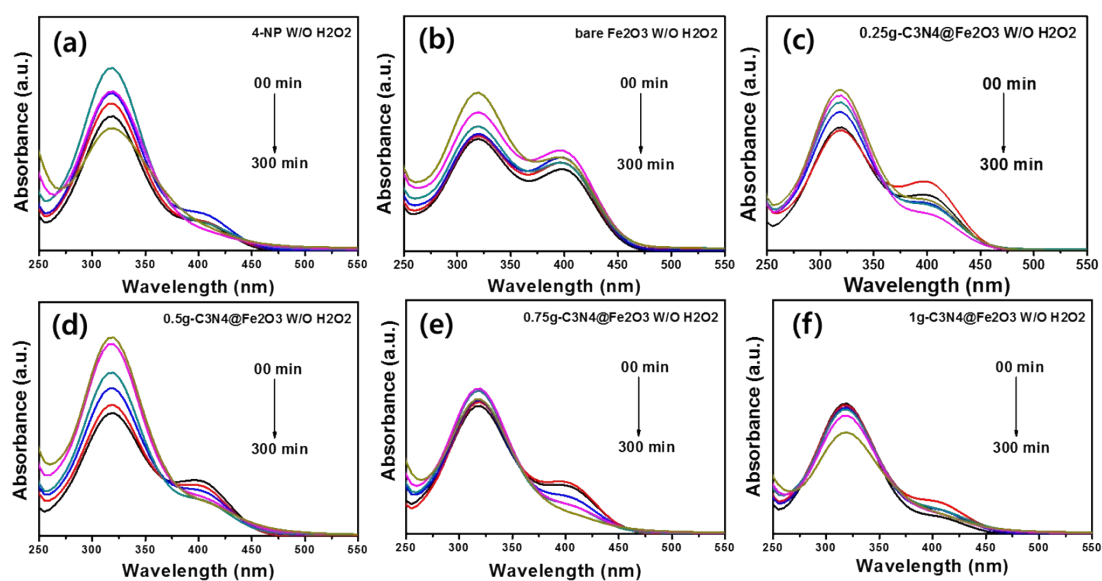

**Supplementary Figure 6. The photocatalytic degradation of 4-nitrophenol without  $\text{H}_2\text{O}_2$ . (a) No photocatalyst, (b) bare  $\text{Fe}_2\text{O}_3$ , (c)  $0.25\text{g-C}_3\text{N}_4@\text{Fe}_2\text{O}_3$ , (d)  $0.5\text{g-C}_3\text{N}_4@\text{Fe}_2\text{O}_3$ , (e)  $0.75\text{g-C}_3\text{N}_4@\text{Fe}_2\text{O}_3$ , and (f)  $1\text{g-C}_3\text{N}_4@\text{Fe}_2\text{O}_3$  (all acting over 300 min).**

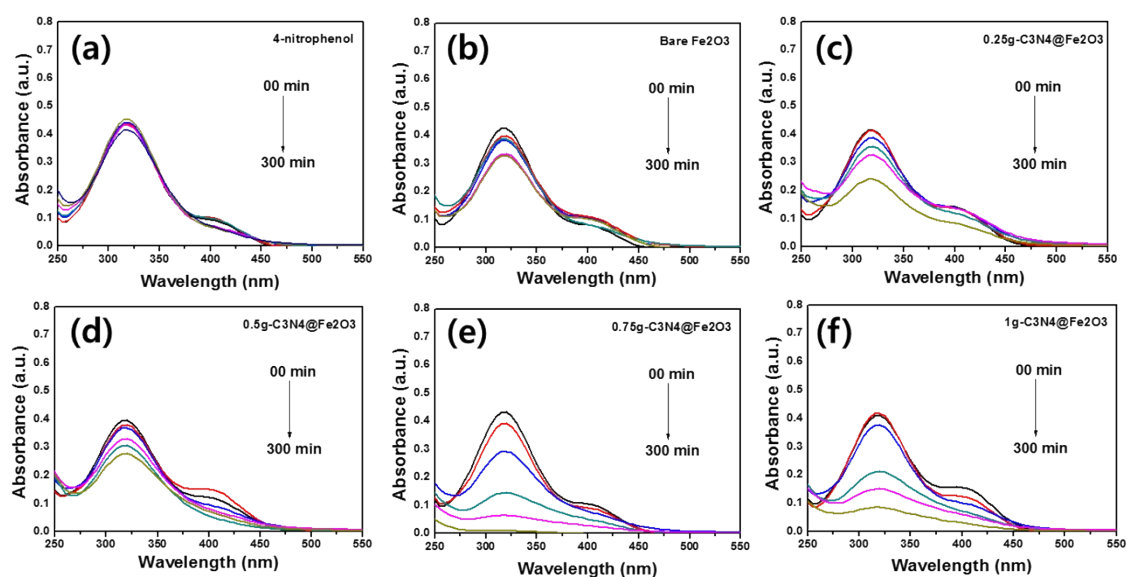

**Supplementary Figure 7.** The absorbance values associated with photocatalytic degradation of 4-nitrophenol. (a) No photocatalyst, (b) bare  $\text{Fe}_2\text{O}_3$ , (c)  $0.25\text{g-C}_3\text{N}_4@\text{Fe}_2\text{O}_3$ , (d)  $0.5\text{g-C}_3\text{N}_4@\text{Fe}_2\text{O}_3$ , (e)  $0.75\text{g-C}_3\text{N}_4@\text{Fe}_2\text{O}_3$ , and (f)  $1\text{g-C}_3\text{N}_4@\text{Fe}_2\text{O}_3$  (all acting over 300 min).

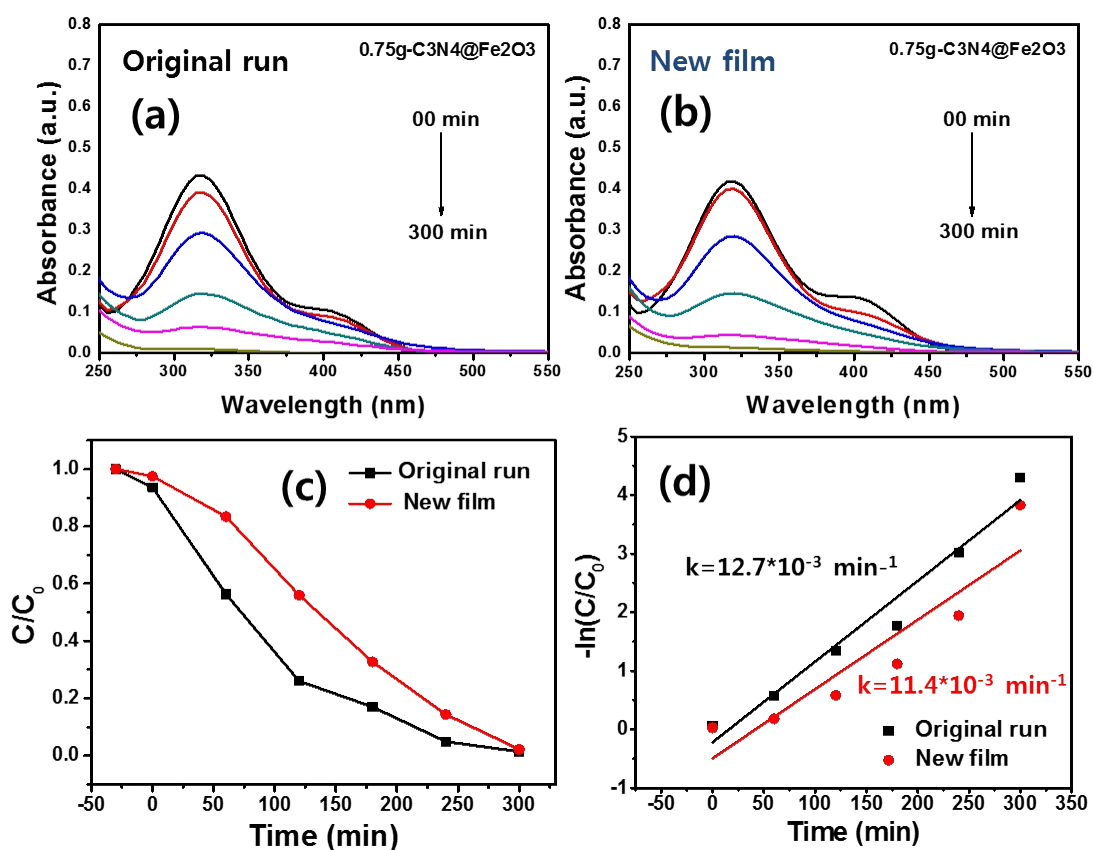

Supplementary Figure 8. Comparison in photocatalytic activity using two film of 0.75g-C<sub>3</sub>N<sub>4</sub>@Fe<sub>2</sub>O<sub>3</sub>. (a) photodegradation result using original film, (b) photodegradation result using new film, comparison in (c) relative absorbance and (d) the linear fitting of logarithm absorbance with kinetic rate constant between two film.

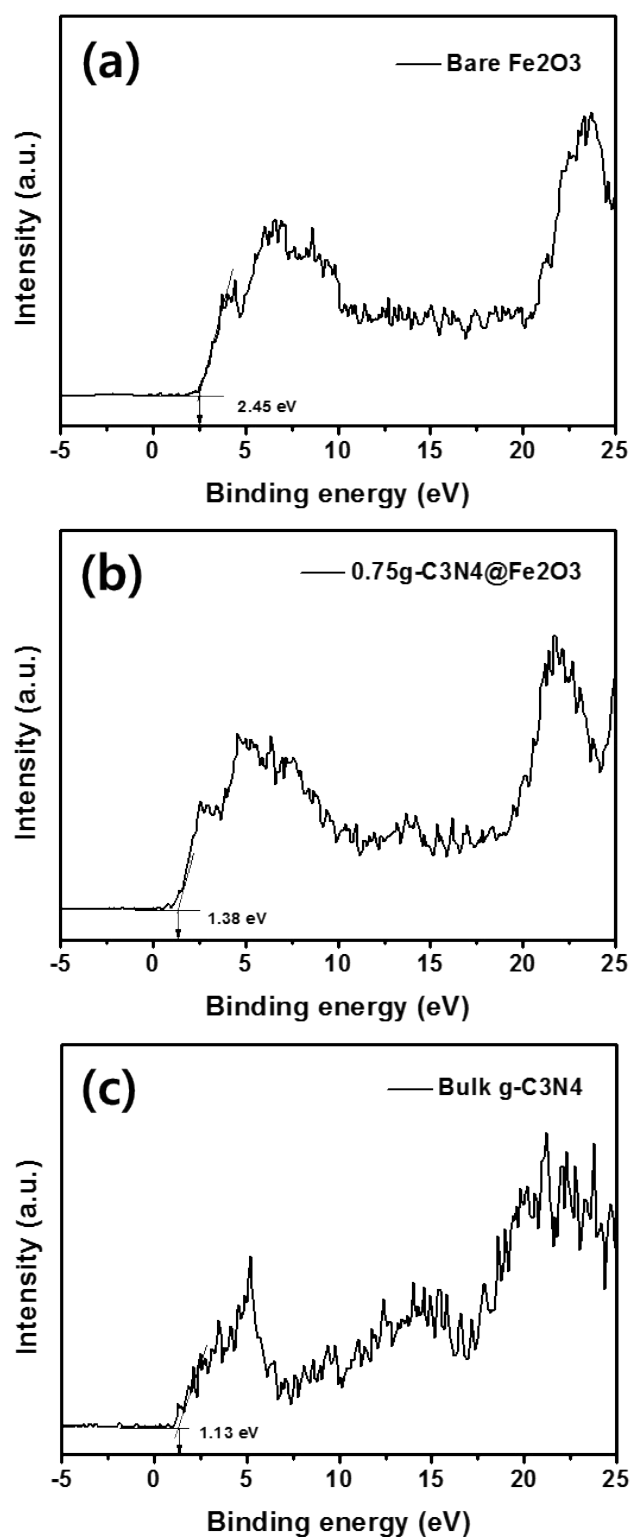

Supplementary Figure 9. XPS analysis measuring valence band for (a) bare  $\text{Fe}_2\text{O}_3$  (b) 0.75g- $\text{C}_3\text{N}_4@\text{Fe}_2\text{O}_3$  and (c) bulk g- $\text{C}_3\text{N}_4$
